# Supplementary material for: Recent HIV infection and associated factors among newly diagnosed HIV cases in the Southwest Ethiopia Regional State: HIV case-based surveillance analysis (2019–2022)
Source: PubMed Central journal article supplement (PMC11188228; doi:10.1186/s12879-024-09481-z), 2024-06-20

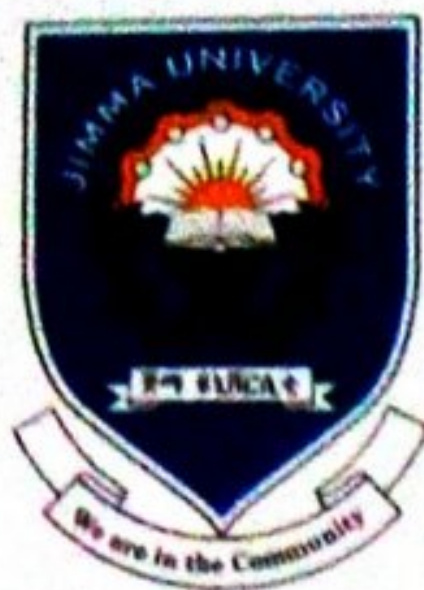

# JIMMA UNIVERSITY

ጅማ ዩኒቨርሲቲ

ቁጥር  
Ref.No. EPID/473/2022  
ቀን  
Date 30/8/2022

To Ethiopia Public Health Institute (EPHI)-HIV CBS Case team/EPHI CPAC

Addis Ababa, Ethiopia

From Jimma University/Department of Epidemiology

Jimma, Ethiopia

**Subject: HIV Case Based Surveillance (CBS) Data Access Support Request**

We are writing this letter in support of our MPH field Epidemiology student Mr. Nigatu Admsu (Cohort-VII, R-I HIV Track Resident) for the acquisition of HIV secondary data from data base (REDCap) for his fulfilment for the requirement of Residency-I Output. Nigatu has been working as a residency-I (HIV Track resident) at Bonga Field Base and he want to analyse the South Western Regional (SWR) health bureau HIV case based Surveillance data as the requirement for his Residency-I output. He has completed a proposal related to HIV case Based Surveillance and has submitted to his mentors and advisor's for consideration. Currently, he is waiting your decision in access to the SWR health bureau data related to HIV Case Based Surveillance.

Since the time for residency-I is near completion, we would like to request your office (EPHI HIV CBS Publication Advisory Committee (CPAC)) to facilitate the usual cooperation according to your organizational data access policy in accessing the data for the resident.

Sincerely,

  
Dr. Lelisa Sena  
Head, Department  
of Epidemiology

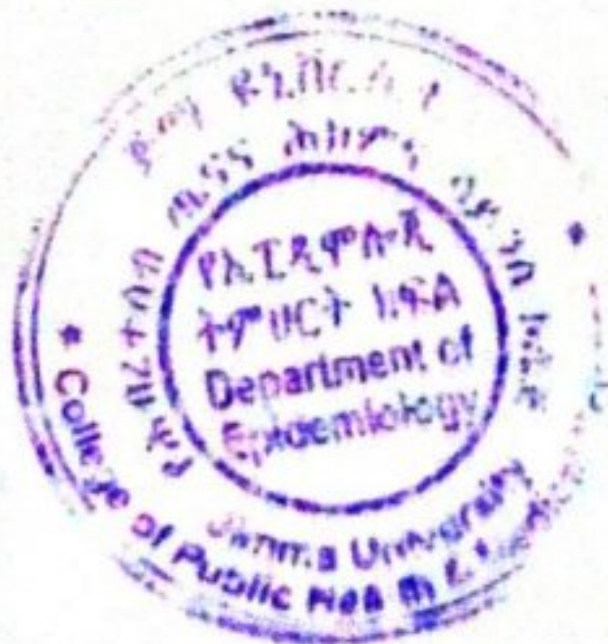

Supplement: 12879_2024_9481_MOESM1_ESM.pdf [file 12879_2024_9481_MOESM1_ESM.pdf]
